# Supplementary material
Source: PubMed Central journal article supplement (PMC2610514)

## SUPPLEMENTAL FIGURE LEGENDS

SUPPLEMENTAL FIGURE 1. **MRAP and RAMP constructs.** Shown are the sequences of MRAP and RAMP constructs used in the experiments described here.

SUPPLEMENTAL FIGURE 2. **Specificity of bimolecular fluorescence complementation.** CHO cells were transfected with V5-MRAP-YFP-F2 and either YFP-F1-V5-RAMP3 or YFP-F1-V5-MRAP, or with YFP-F1-V5-MRAP and V5-RAMP3-YFP-F2. Live cells were stained for surface V5 epitope and YFP fluorescence was imaged. Panel A shows identically processed fluorescent images. B. YFP fluorescence was quantified in all cells staining for V5 in randomly selected fields of blinded slides using Metamorph software from Universal Imaging. The bargraph presents mean and SE for the number of cells shown. \*= P<0.001.

SUPPLEMENTAL FIGURE 3. **Total MC2 receptor expression with MRAP mutants.** CHO cells transfected with HA-MC2 receptor and RAMPs, MRAP or MRAP mutants were treated with vehicle or 20  $\mu$ M MG132 for 6 hours, fixed and permeabilized. Total HA-MC2 receptor expression was measured using anti-HA antibody and is normalized to the value with MRAP.

SUPPLEMENTAL FIGURE 4. **MC2 receptor agonist specificity.** CHO cells were either mock-transfected or transfected with HA-MC2 receptor and MRAP or MRAP(18-21A). Cells were incubated for 20 min with 0.1 mM isobutylmethylxanthine and 100 nM ACTH(1-24), ACTH(1-18) or NDP- $\alpha$ -MSH before measurement of cAMP.

Supplemental Figure 1

| NAME                    | SEQUENCE                                                                                                                                                            | MRAP DELETION MUTANTS                                           |
|-------------------------|---------------------------------------------------------------------------------------------------------------------------------------------------------------------|-----------------------------------------------------------------|
|                         | 1            10            20            30            40            50            60            127                                                                |                                                                 |
| MRAP                    | MANGTDASVPLTSY EYYLDYIDLIPVDEK K LKANKHSIVIALWLSLATFV VLLFLILLYMSWSGS...PLALPGKPIPNPLLGLDST                                                                         |                                                                 |
| MRAPΔ4-8                | MAN-----VPLTSY EYYLDYIDLIPVDEK K LKANKHSIVIALWLSLATFV VLLFLILLYMSWSGS...PLALPDYKDDDDK                                                                               |                                                                 |
| MRAPΔ10-20              | MANGTDASV-----IDLIPVDEK K LKANKHSIVIALWLSLATFV VLLFLILLYMSWSGS...PLALPGKPIPNPLLGLDST                                                                                |                                                                 |
| MRAPΔ21-30              | MANGTDASVPLTSY EYYLDY-----LKANKHSIVIALWLSLATFV VLLFLILLYMSWSGS...PLALPDYKDDDDK                                                                                      |                                                                 |
| MRAPΔ31-37              | MGKPIPNPLLGLDSTANGTDASVPLTSY EYYLDYIDLIPVDEK K-----IVIALWLSLATFV VLLFLILLYMSWSGS...PLALPTRDYKDHGDYKDHDIDYKDDDDK                                                     |                                                                 |
| MRAPΔ1-30               | MGKPIPNPLLGLDST-----LKANKHSIVIALWLSLATFV VLLFLILLYMSWSGS...PLALPTRDYKDHGDYKDHDIDYKDDDDK                                                                             |                                                                 |
|                         |                                                                                                                                                                     | MRAP SUBSTITUTION MUTANTS                                       |
|                         | 1            10            20            30            40            50            60            127                                                                |                                                                 |
| MRAP                    | MANGTDASVPLTSY EYYLDYIDLIPVDEK K LKANKHSIVIALWLSLATFV VLLFLILLYMSWSGS...PLALPGKPIPNPLLGLDST                                                                         |                                                                 |
| MRAP 10-13A             | MANGTDASVAAAAEYYLDYIDLIPVDEK K LKANKHSIVIALWLSLATFV VLLFLILLYMSWSGS...PLALPGKPIPNPLLGLDST                                                                           |                                                                 |
| MRAP 13-17A             | MANGTDASVPLTSAAAALDYIDLIPVDEK K LKANKHSIVIALWLSLATFV VLLFLILLYMSWSGS...PLALPGKPIPNPLLGLDST                                                                          |                                                                 |
| MRAP 18-21A             | MANGTDASVPLTSY EYAAAADLIPVDEK K LKANKHSIVIALWLSLATFV VLLFLILLYMSWSGS...PLALPGKPIPNPLLGLDST                                                                          |                                                                 |
| MRAP L18A               | MANGTDASVPLTSY EYYADYIDLIPVDEK K LKANKHSIVIALWLSLATFV VLLFLILLYMSWSGS...PLALPGKPIPNPLLGLDST                                                                         |                                                                 |
| MRAP D19A               | MANGTDASVPLTSY EYYLAYIDLIPVDEK K LKANKHSIVIALWLSLATFV VLLFLILLYMSWSGS...PLALPGKPIPNPLLGLDST                                                                         |                                                                 |
| MRAP Y20A               | MANGTDASVPLTSY EYYLDAIDLIPVDEK K LKANKHSIVIALWLSLATFV VLLFLILLYMSWSGS...PLALPGKPIPNPLLGLDST                                                                         |                                                                 |
| MRAP I21A               | MANGTDASVPLTSY EYYLDYADLIPVDEK K LKANKHSIVIALWLSLATFV VLLFLILLYMSWSGS...PLALPGKPIPNPLLGLDST                                                                         |                                                                 |
|                         |                                                                                                                                                                     | RAMP3/MRAP CHIMERAS CONSTRUCTS                                  |
| RAMP3                   | METGALRRPQLLPLLLLLCGGCPRAGGCNETGML...LEDPPDEVLIPLIVIPVLTVMAGLVVWRSKRTDTLL                                                                                           |                                                                 |
| RAMP3 (no SP)           | MGKPIPNPLLGLDSTCNETGML...LEDPPDEVLIPLIVIPVLTVMAGLVVWRSKRTDTLLTRDYKDHGDYKDHDIDYKDDDDK                                                                                |                                                                 |
| RAMP3 (MRAP 29-37)      | MGKPIPNPLLGLDSTCNETGML...LEDPPDEK LKANKHSIVLIPLIVIPVLTVMAGLVVWRSKRTDTLLTRDYKDHGDYKDHDIDYKDDDDK                                                                      |                                                                 |
| MRAP (RAMP3-TM)         | MGKPIPNPLLGLDSTANGTDASVPL...IDLIPVDEK K LKANKHVLIVIPVLTVMAGLVVWRMSWS...ALPTRDYKDHGDYKDHDIDYKDDDDK                                                                   |                                                                 |
|                         |                                                                                                                                                                     | BIMOLECULAR FLUORESCENCE COMPLEMENTATION CONSTRUCTS             |
| YFP-F1                  | MVSKGEELFTGVVPIVVELDGDVNGHKFSVSGEGDATYKGLTLKFICTTGKLPVWPVTLVTTFGYGLMCFARYPDHMKQHDFFK<br>SAMPEGYVQERTIFFKDDGNYKTRAEVKFEGDTLVNRIELKGIKDFKEDGNILGHKLEYNYNSHNVYIMADKQRS |                                                                 |
| YFP-F2                  | KNGIKVNFKIRHNIEDGSVQLADHYQQNTPIGDGPVLLPDNHYLSYQSALS KDPNEKRDMVLLFVTAAGITLGMDELYK                                                                                    |                                                                 |
| YFP-F1-V5-MRAP-3F       | (YFP-F1) ATMGKPIPNPLLGLDSTANGTDASVPLTSY...PLALPTRDYKDHGDYKDHDIDYKDDDDK                                                                                              |                                                                 |
| V5-MRAP-YFP-F2          | MGKPIPNPLLGLDSTANGTDASVPLTSY...PLALPTR (YFP-F2)                                                                                                                     |                                                                 |
| V5-MRAP-YFP-F1          | MGKPIPNPLLGLDSTANGTDASVPLTSY...PLALPTR (YFP-F1)                                                                                                                     |                                                                 |
| YFP-F1-V5-MRAPΔ31-37-3F | (YFP-F1) ATMGKPIPNPLLGLDSTANGTD...IPVDEK K-----IVIALWLSLATFV VLLFLILLYM...LALPTRDYKDHGDYKDHDIDYKDDDDK                                                               |                                                                 |
| V5-MRAPΔ31-37-YFP-F2    | ATMGKPIPNPLLGLDSTANGTD...IPVDEK K-----IVIALWLSLATFV VLLFLILLYM...PLALPTR (YFP-F2)                                                                                   |                                                                 |
| YFP-F1-V5-RAMP3-3F      | (YFP-F1) ATMGKPIPNPLLGLDSTCNETGML...RSKRTDTLLTRDYKDHGDYKDHDIDYKDDDDK                                                                                                |                                                                 |
| V5-RAMP3-YFP-F2         | MGKPIPNPLLGLDSTCNETGML...RSKRTDTLLTR (YFP-F2)                                                                                                                       |                                                                 |
|                         |                                                                                                                                                                     | V5 epitope (red) / Flag epitope (blue) / Signal peptide (green) |

Supplemental Figure 2

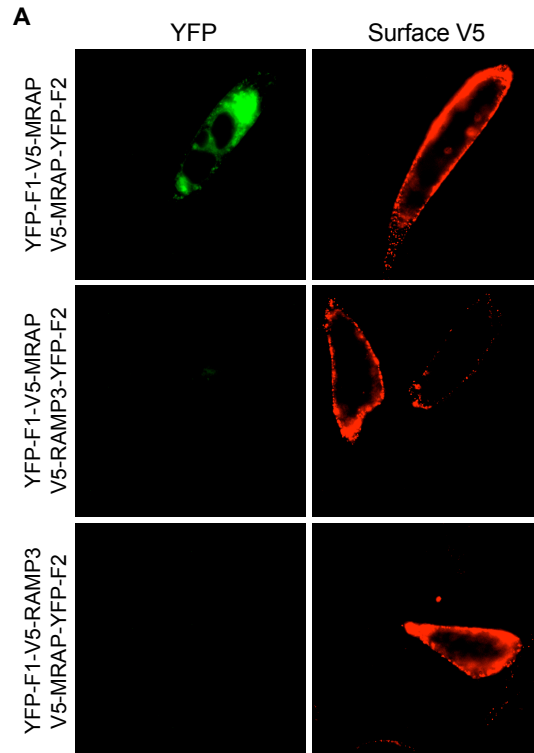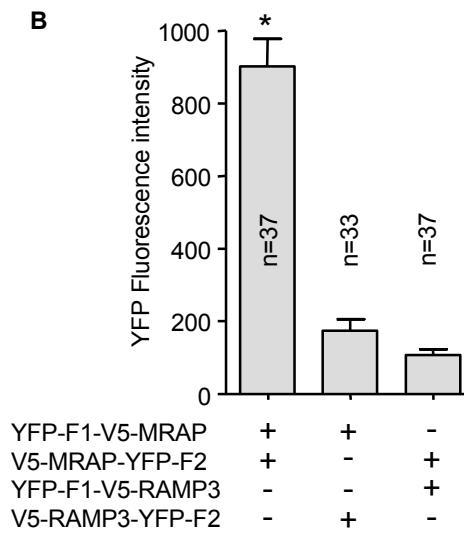

Supplemental Figure 3

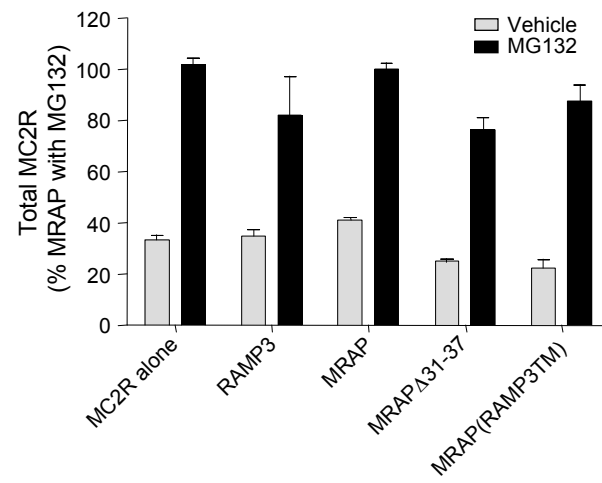

Supplemental figure 4

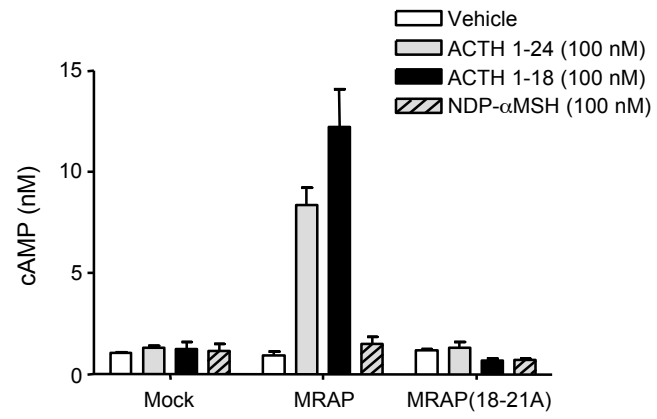

Supplement: M804413200_1.pdf [file M804413200_1.pdf]
